# Supplementary figures and images for: Expression of Genes Related to Sugar and Amino Acid Transport and Cytokinin Metabolism during Leaf Development and Senescence in Pisum sativum L
Source: MDPI journal article supplement (doi:10.3390/plants8030076), 2019-03-25

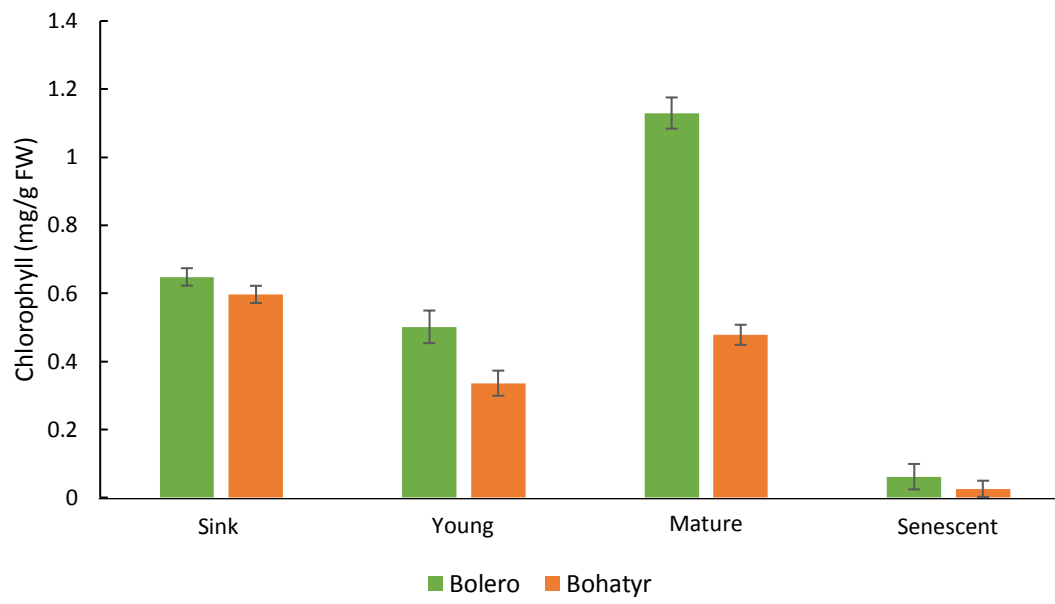

Supplement: s1 [file s1]

Relative expression (mean fold change)

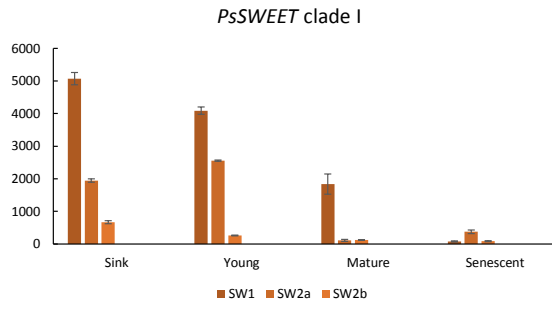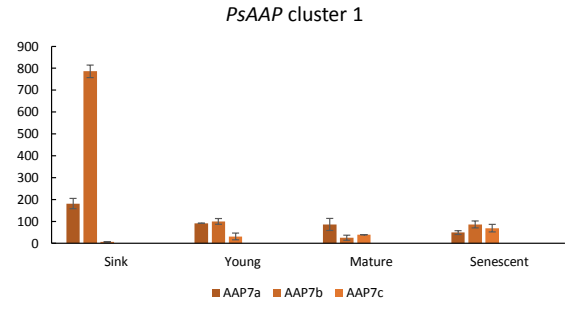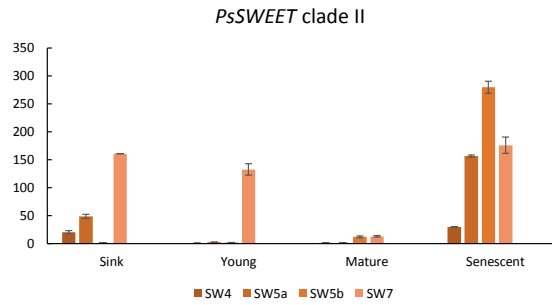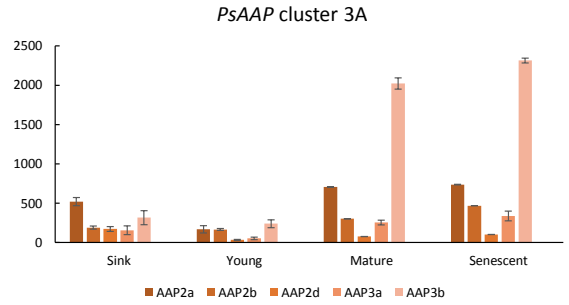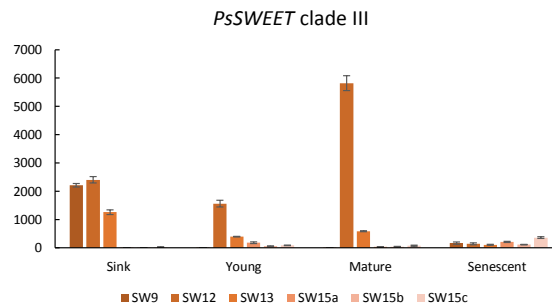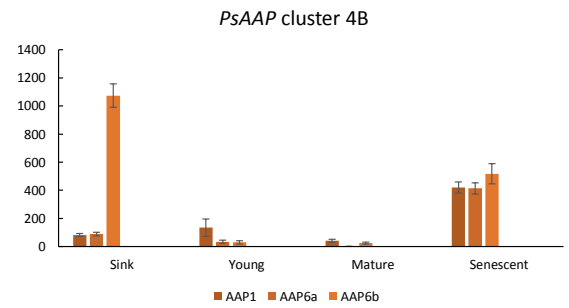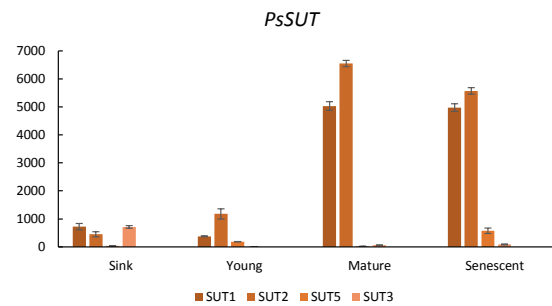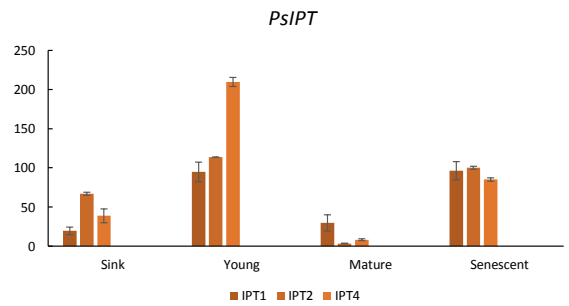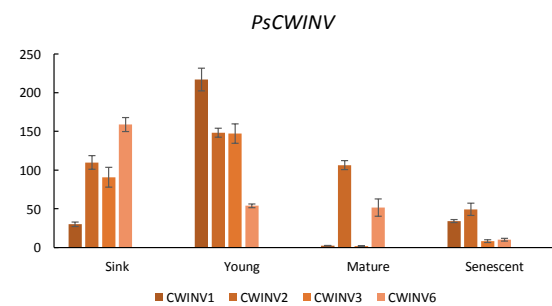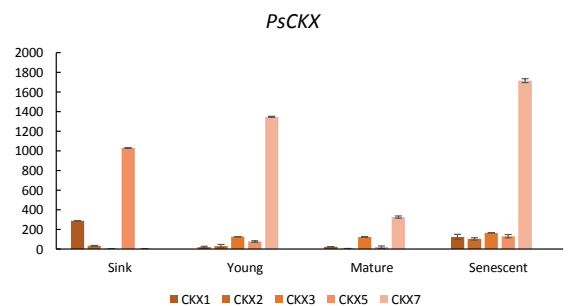

Supplement: s1 [file s1]

Relative expression (mean fold change)

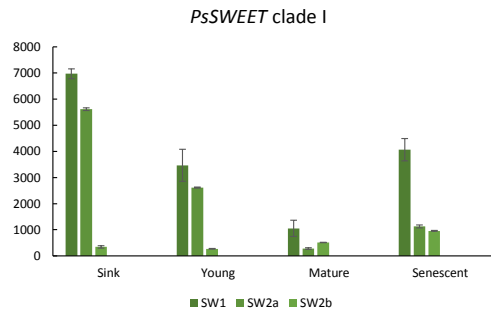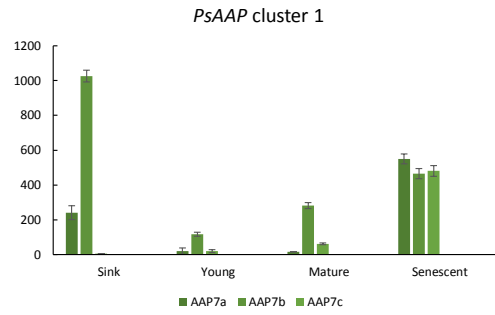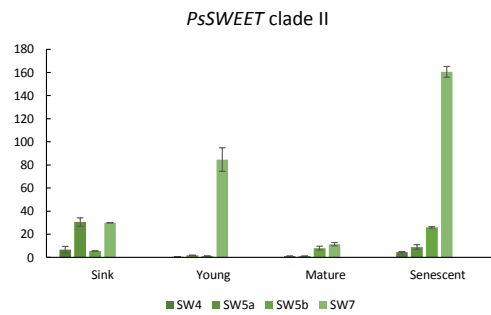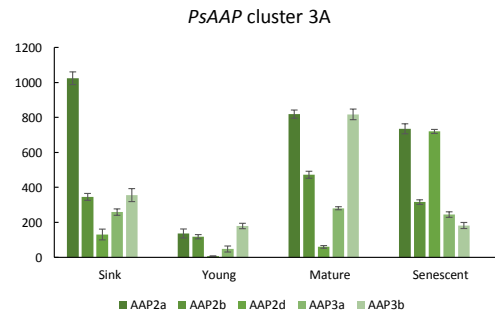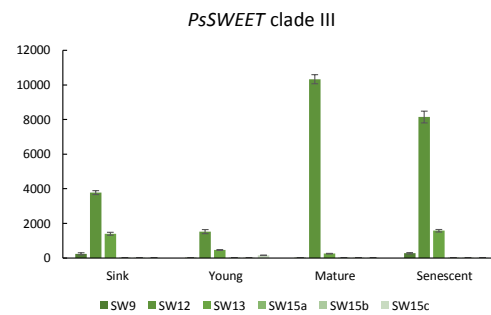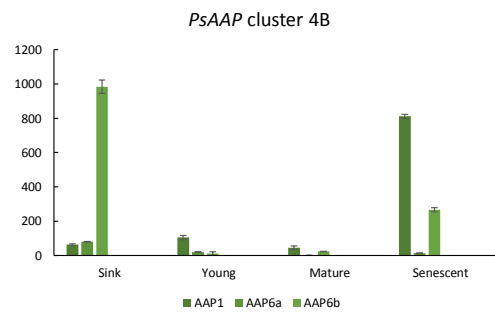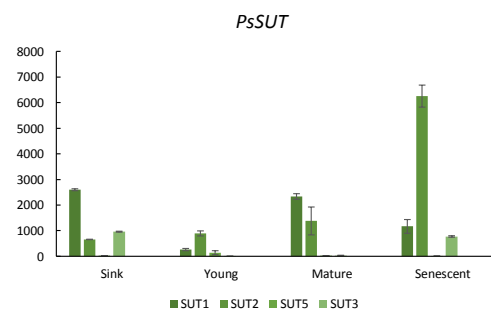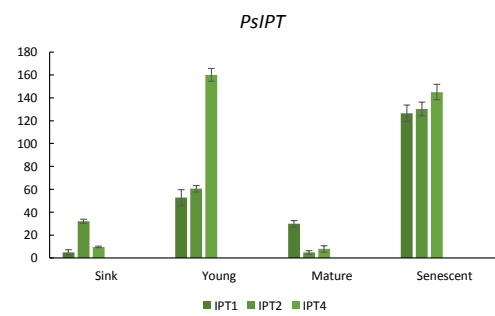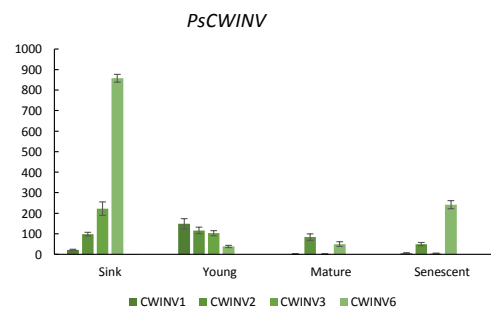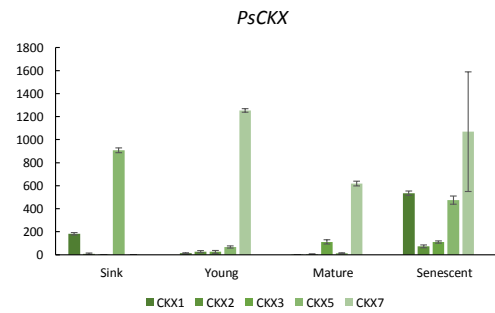

Supplement: s1 [file s1]
